# Supplementary material for: Facile synthesis of dicyanovinyl-di(meso-aryl)dipyrromethenes via a dipyrromethene–DDQ adduct
Source: Royal Society of Chemistry journal article supplement (doi:10.1039/b904446a), 2009-01-01

# Facile synthesis of dicyanovinyl-di(*meso*-aryl)dipyrromethenes via a dipyrromethene-DDQ adduct

Ji-Young Shin\*, Brian O. Patrick and David Dolphin\*

## Experimental and NMR data

|                                                            |       |     |
|------------------------------------------------------------|-------|-----|
| General                                                    | ----- | S1  |
| Procedure                                                  | ----- | S1  |
| NMR spectra of <b>2</b> , <b>3</b> , <b>4</b> and <b>5</b> | ----- | S2  |
| Crystallographic data                                      | ----- | S10 |

## Experimental and NMR data

### General

All chemicals were purchased from commercial suppliers and used without further purification. Column chromatography of all products was carried out using silica gel (particle size: 0.040-0.063 mm, 230-400 mesh). <sup>1</sup>H and <sup>13</sup>C NMR spectra were recorded with Bruker Avance 300 and 400 NMR spectrometers in CD<sub>2</sub>Cl<sub>2</sub>. Mass spectra were determined on EI or ESI mass spectrometers. Optical spectra were recorded with a Cary 5000 UV-vis spectrophotometer using a 1 cm cell. The crystals were grown by diffusion of hexane into CH<sub>2</sub>Cl<sub>2</sub> solutions. Data were collected and integrated using the Bruker SAINT software package and corrected for absorption effects using the multi-scan technique (SADABS). The structures were solved by direct methods and all refinements were performed using the SHELXTL crystallographic software package from Bruker-AXS.

### Procedure

#### Dipyrromethane **1**:

*Meso*-2,6-dichlorophenyldipyrromethane was prepared following the reference method.<sup>S1</sup>

Column chromatography on silica gel using a mixed eluent of CH<sub>2</sub>Cl<sub>2</sub> and hexane (3:1), followed by recrystallization from CH<sub>2</sub>Cl<sub>2</sub> and hexane yielded an off-white solid in 60% yield.

#### Compounds **2-4**:

DDQ (2.29 g, 10.09 mmol) was added into a CH<sub>2</sub>Cl<sub>2</sub> (150 mL) solution of *meso*-2,6-dichlorophenyldipyrromethane (1.11g, 3.85 mmol). After stirring for 2 days, the reaction mixture was concentrated and column chromatographed on silica gel using CH<sub>2</sub>Cl<sub>2</sub>. Three fractions were collected (first red (**3**), second yellow (**2**), and third blue) and each was recrystallized from CH<sub>2</sub>Cl<sub>2</sub> and hexane (yields: 30% (330 mg) and 8% (124 mg) for **2**, and **3**, respectively). A small amount of compound **3** was lost during the isolation due to its poor solubility. Compound **4** was prepared by the addition of Et<sub>3</sub>N (0.5 mL) into a CH<sub>2</sub>Cl<sub>2</sub> (75 mL) solution of **3** (30 mg, 37.4 μmol) and purified by column chromatography on silica gel using CH<sub>2</sub>Cl<sub>2</sub> as eluent (80% yield).

**Spectral data of 2** : <sup>1</sup>H NMR (400 MHz, CD<sub>2</sub>Cl<sub>2</sub>) δ = 12.36 (bs, 1H, NH), 7.66 (s, 2H, αH), 7.47 (dd, *J* = 8.6, <sup>dd</sup>*J* = 1.2, 2H, *meta*-H), 7.39 (t, *J* = 7.2, 1H, *para*-H), 6.39 (m, 4H, βH); <sup>13</sup>C NMR (100 MHz, CD<sub>2</sub>Cl<sub>2</sub>) δ = 145.11 (αC), 140.45, 136.02, 135.49, 135.25, 130.93 (*para*-C), 128.60 (*meta*-C), 127.29 (βC), 118.96 (βC); *m/z* HREIMS found 288.02273 (100%), calcd. 288.02210 for C<sub>15</sub>H<sub>10</sub>N<sub>2</sub><sup>35</sup>Cl<sub>2</sub> (M<sup>+</sup>); λ<sub>max</sub> (nm, CH<sub>2</sub>Cl<sub>2</sub>, log ε) 431 (4.49).

**Spectral data of 3** : <sup>1</sup>H NMR (400 MHz, CD<sub>2</sub>Cl<sub>2</sub>) δ = 11.18 (bs, 2H, NH), 7.64 (m, 2H, αH), 7.52-7.40 (m, 6H, Aryl-H), 6.79 (d, *J* = 4.3, 2H, βH of inner pyrrole), 6.73 (d, *J* = 4.3, 2H, βH of inner pyrrole), 6.42 (m, 4H, βH of terminal pyrrole); <sup>13</sup>C NMR (100 MHz, CD<sub>2</sub>Cl<sub>2</sub>) δ = 176.67, 156.04, 146.84, 142.83, 141.78, 136.71 (βC), 135.96, 135.66, 134.93 (αC), 134.19, 131.56 (*para*-C), 131.50, 128.82 (*meta*-C), 128.68 (*meta*-C), 126.19 (βC), 121.95 (βC), 114.57 (βC), 114.27, 30.28 (sp<sup>3</sup>C); *m/z* HRESIMS found 802.9671, calcd. 802.9691 for C<sub>38</sub>H<sub>19</sub>N<sub>6</sub>O<sub>2</sub><sup>35</sup>Cl<sub>5</sub><sup>37</sup>Cl ([M+H]<sup>+</sup>); λ<sub>max</sub> (nm, CH<sub>2</sub>Cl<sub>2</sub>, log ε) 500 (4.64).

**Spectral data of 4** : <sup>1</sup>H NMR (400 MHz, CD<sub>2</sub>Cl<sub>2</sub>) δ = 12.94 (bs, 2H, NH), 7.59 (m, 2H, αH), 7.54-7.42 (m, 6H, Aryl-H), 7.16 (d, *J* = 4.5, 2H, βH of inner pyrrole), 6.72 (d, *J* = 4.3, 2H, βH of inner pyrrole), 6.47 (dd, 2H, *J* =

4.1,  $^{\text{dd}}J = 1.2$ ,  $\beta\text{H}$  of terminal pyrrole), 6.42 (dd, 2H,  $J = 4.3$ ,  $^{\text{dd}}J = 2.2$ ,  $\beta\text{H}$  of terminal pyrrole);  $^{13}\text{C}$  NMR (100 MHz,  $\text{CD}_2\text{Cl}_2$ )  $\delta = 140.04$ , 136.82 ( $\alpha\text{C}$ ), 135.95, 134.58, 133.75, 133.57 ( $\beta\text{C}$ ), 131.47, 128.77 (Aryl-C), 126.19 ( $\beta\text{C}$ ), 125.77 ( $\beta\text{C}$ ), 119.57, 115.38 ( $\beta\text{C}$ ), 114.09;  $m/z$  HREIMS found 650.03271 (100%), calcd. 650.03471 for  $\text{C}_{34}\text{H}_{18}\text{N}_6^{35}\text{Cl}_4$  ( $\text{M}^+$ );  $\lambda_{\text{max}}$  (nm,  $\text{CH}_2\text{Cl}_2$ , log  $\epsilon$ ) 335 (4.18), 492 (3.59), 680 (4.31), 735 (4.50).

#### Compound 5:

$\text{AlCl}_3$  (300 mg) in MeOH (15 mL) was added into a THF (35 mL) solution of **3** (54 mg, 67.3  $\mu\text{mol}$ ). After refluxing for 2 days, the reaction mixture was poured into water and extracted with  $\text{CH}_2\text{Cl}_2$ . The result solution was evaporated and the residue was column chromatographed on silica gel using  $\text{CH}_2\text{Cl}_2$ . The fastest pink fraction was collected and recrystallized from  $\text{CH}_2\text{Cl}_2$  and hexane (10 mg, 30%)

*Spectral data of 5*:  $^1\text{H}$  NMR (400 MHz,  $\text{CD}_2\text{Cl}_2$ )  $\delta = 12.43$  (bs, 2H, NH), 7.54-7.35 (m, 6H, Aryl-H), 6.99 (dd,  $J = 4.0$ ,  $^{\text{dd}}J = 2.4$ , 2H,  $\beta\text{H}$ ), 6.56 (d,  $J = 4.8$ , 2H,  $\beta\text{H}$ ), 6.33 (d, 2H,  $J = 4.8$ ,  $\beta\text{H}$ ), 6.05 (dd, 2H,  $J = 4.4$ ,  $^{\text{dd}}J = 1.6$ ,  $\beta\text{H}$ ), 4.29 (s, 6H, OMe);  $^{13}\text{C}$  NMR (100 MHz,  $\text{CD}_2\text{Cl}_2$ )  $\delta = 178.39$ , 160.22, 149.84, 144.99, 140.59, 138.79, 137.14 ( $\beta\text{C}$ ), 136.90, 134.20, 131.24 (Aryl-C), 129.45, 128.79 (Aryl-C), 124.18, 122.67 ( $\beta\text{C}$ ), 122.00, 120.70 ( $\beta\text{C}$ ), 118.04 ( $\beta\text{C}$ ), 113.99, 91.93, 58.36;  $m/z$  HRESIMS found 505.9636 (100%), calcd. 505.9633 for  $\text{C}_{22}\text{H}_{12}\text{N}_3^{35}\text{Cl}_4\text{O}_3$  [ $(\text{M}+\text{H})^+$ ];  $\lambda_{\text{max}}$  (nm,  $\text{CH}_2\text{Cl}_2$ , log  $\epsilon$ ) 332 (4.51), 420 (3.94), 542 (4.48), 735 (4.50).

NMR spectra of **2**, **3** and **4**.

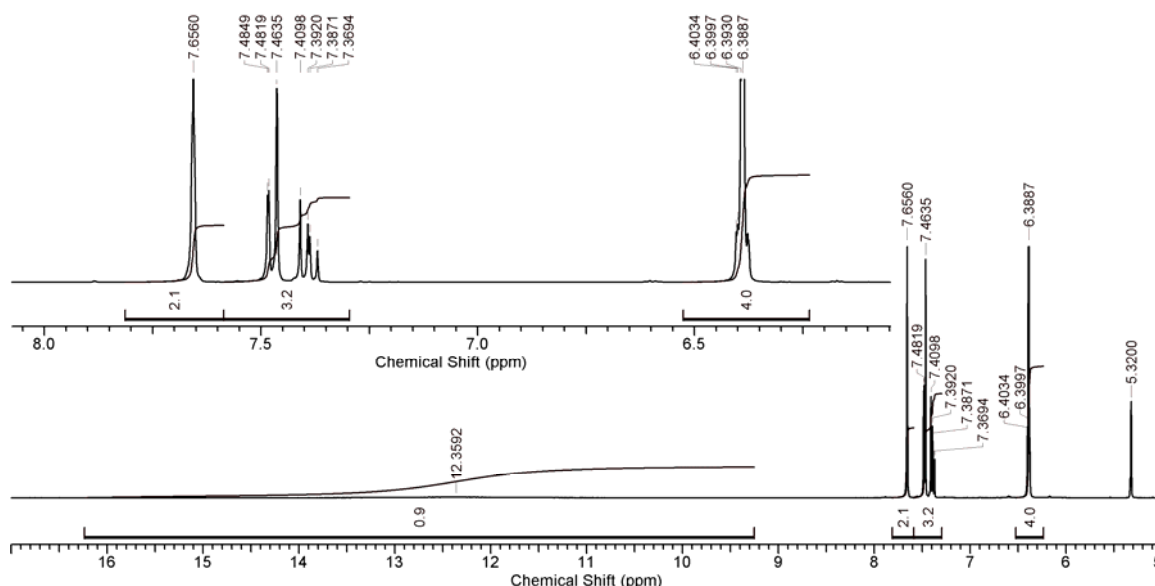

Figure S1.  $^1\text{H}$  NMR (400 MHz) spectrum of **2** in  $\text{CD}_2\text{Cl}_2$ .

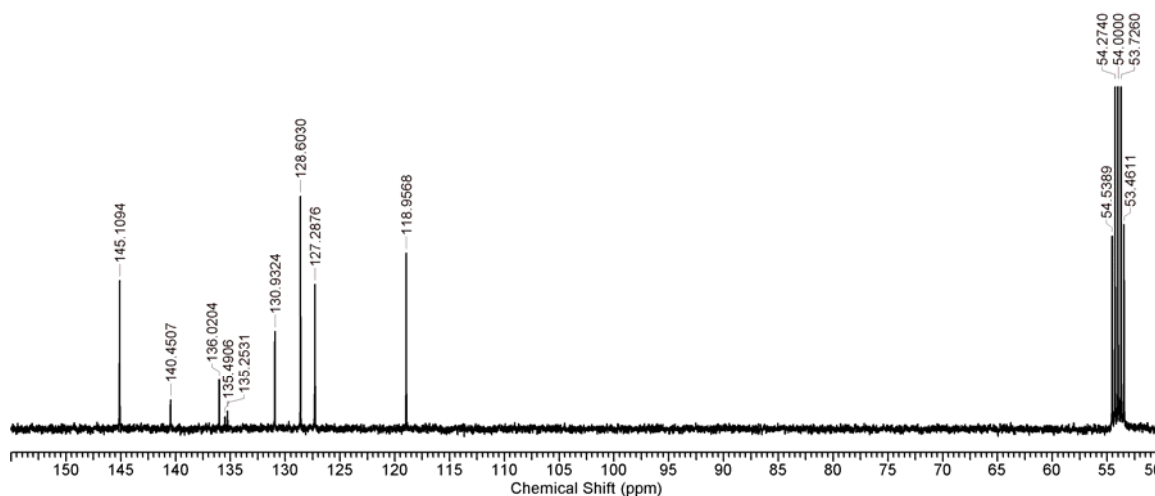

Figure S2.  $^{13}\text{C}$  NMR (100 MHz) spectrum of **2** in  $\text{CD}_2\text{Cl}_2$ .

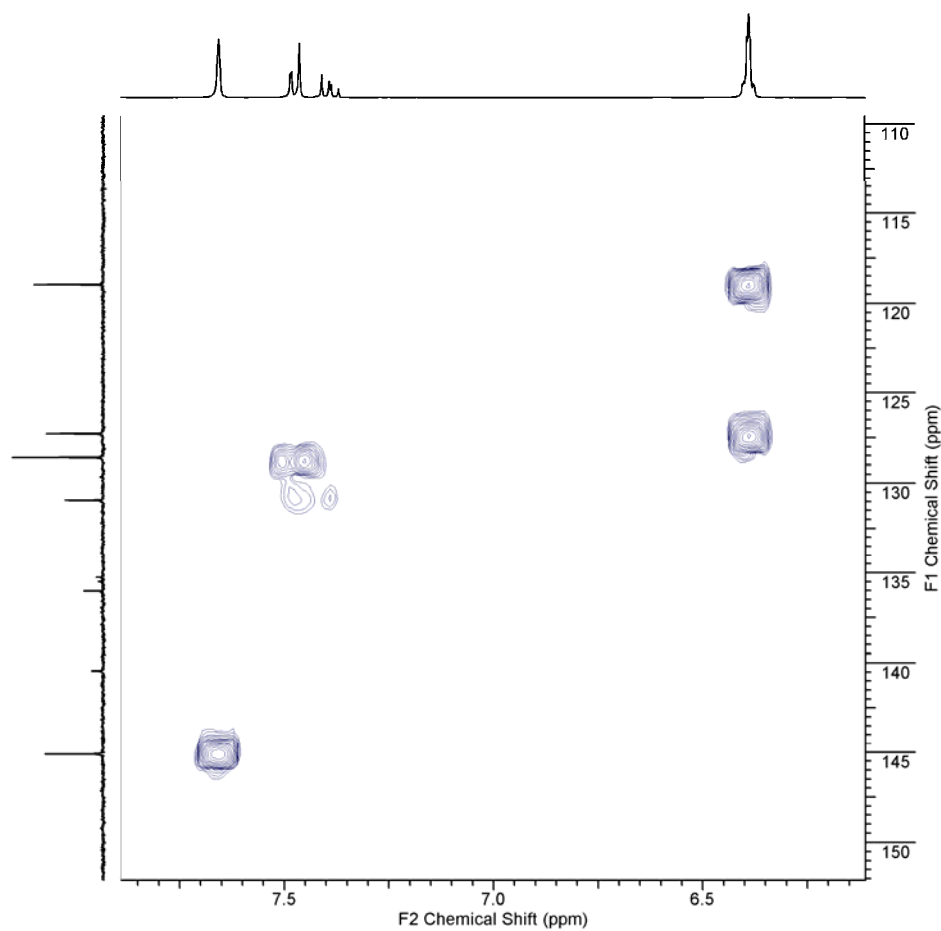

**Figure S3.** HMBC NMR (F1 = 100 MHz and F2 = 400 MHz) spectrum of **2** in  $\text{CD}_2\text{Cl}_2$ .

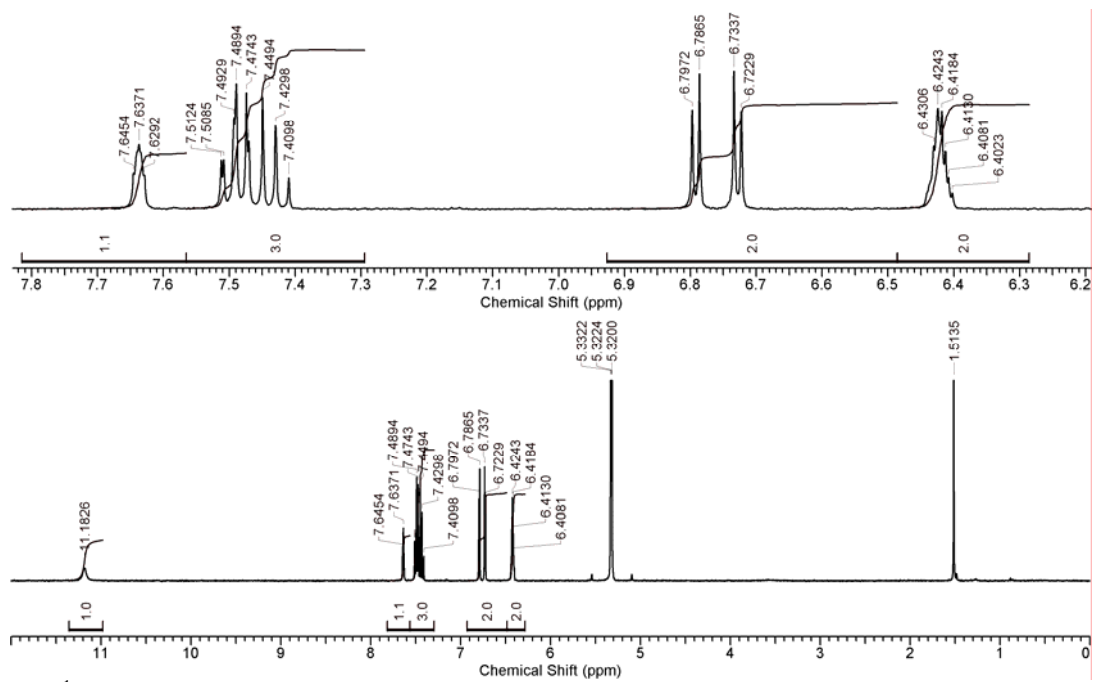

**Figure S4.**  $^1\text{H}$  NMR (400 MHz) spectrum of **3** in  $\text{CD}_2\text{Cl}_2$ .

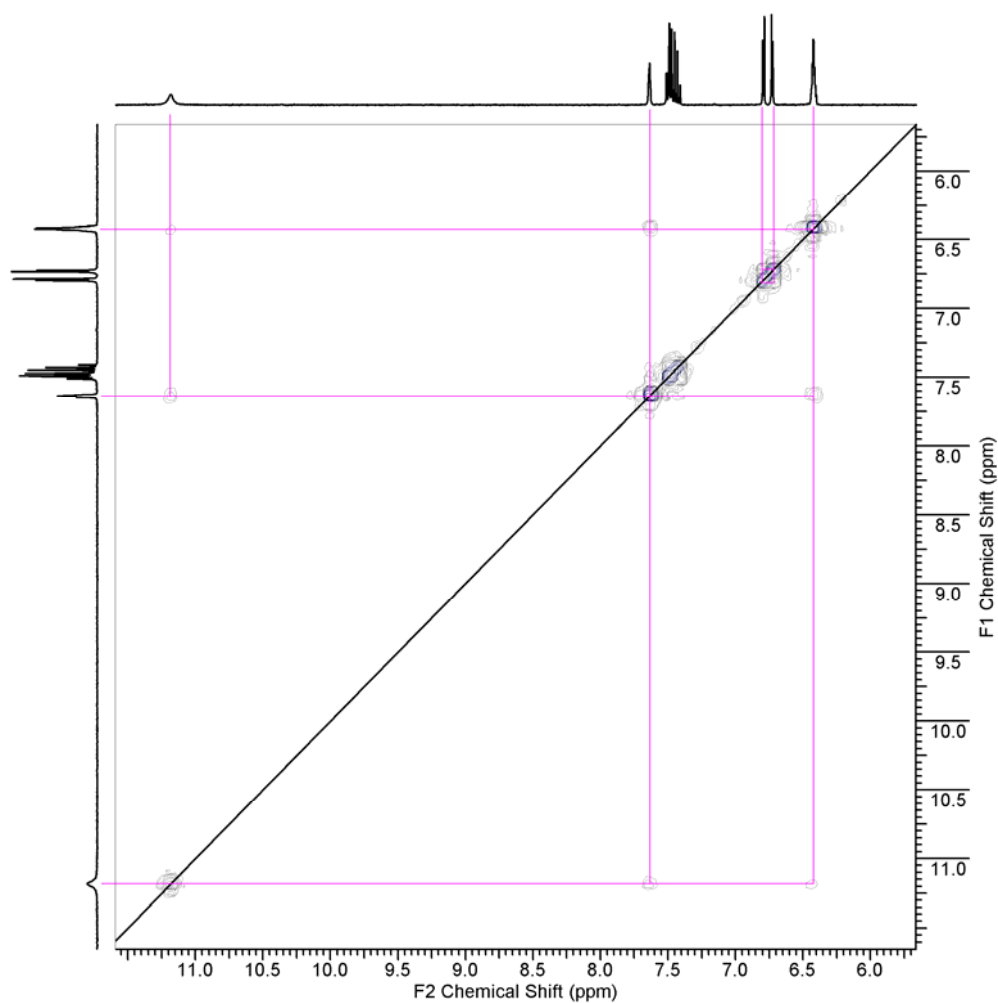

**Figure S5.** HH COSY NMR (F1 = F2 = 400 MHz) spectrum of **3** in  $\text{CD}_2\text{Cl}_2$ .

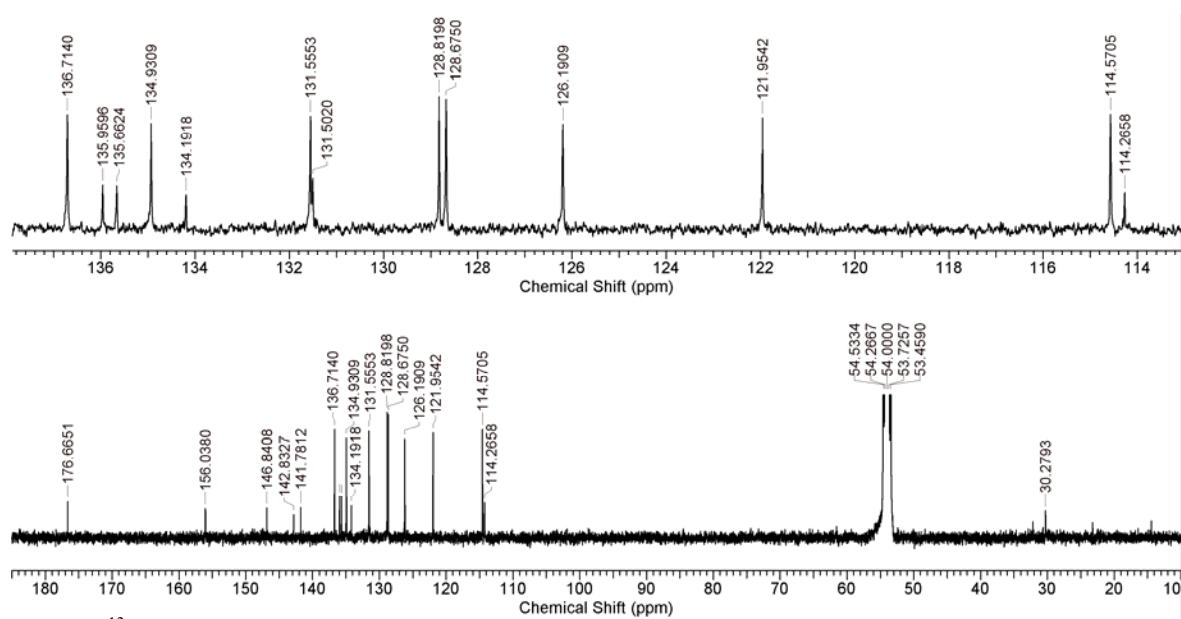

**Figure S6.**  $^{13}\text{C}$  NMR (100 MHz) spectrum of **3** in  $\text{CD}_2\text{Cl}_2$ .

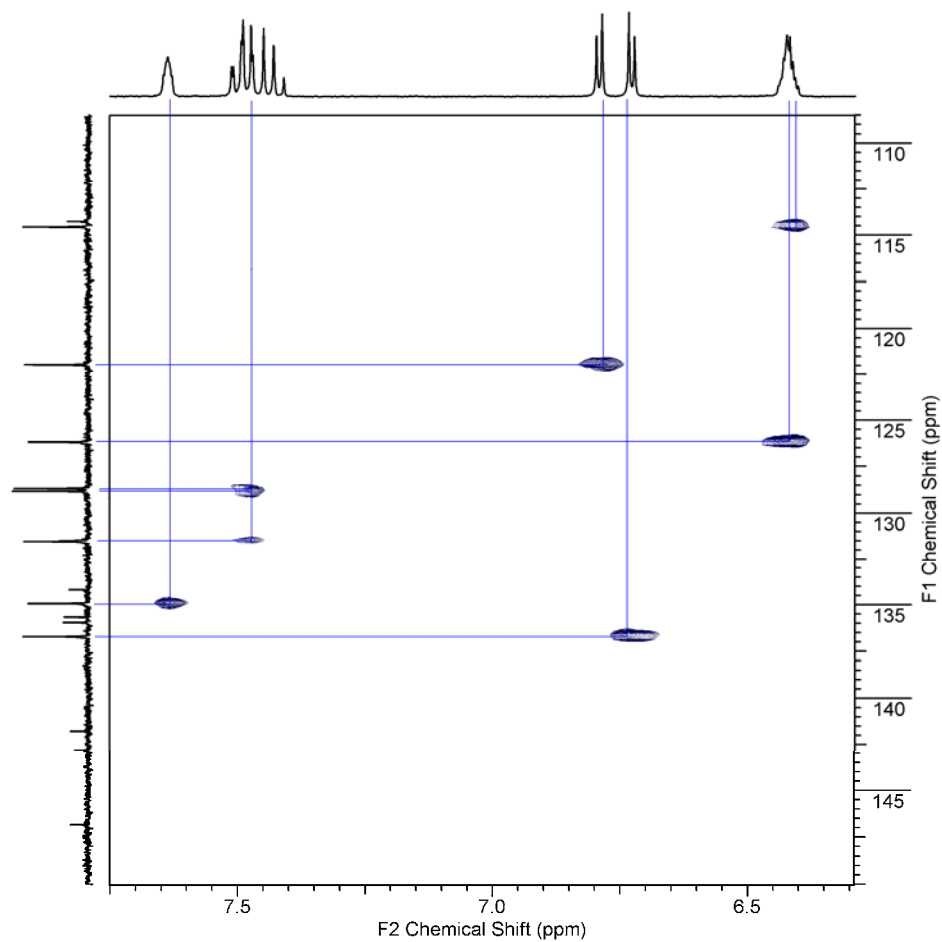

**Figure S7.** HMOC NMR (F1 = 100 MHz and F2 = 400 MHz) spectrum of **3** in  $\text{CD}_2\text{Cl}_2$ .

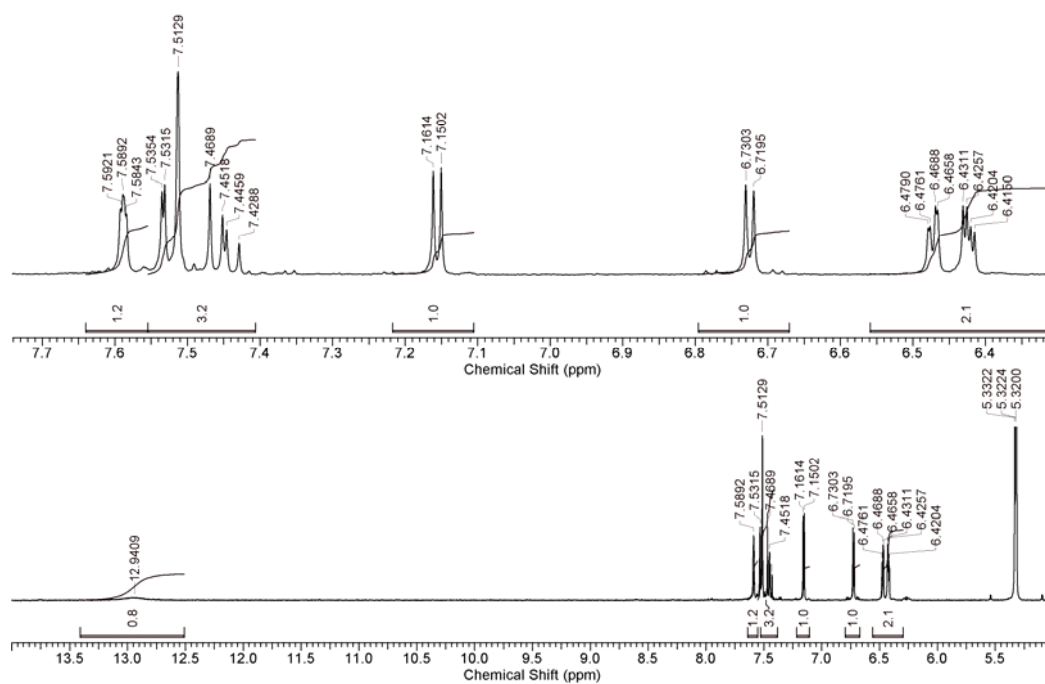

**Figure S8.**  $^1\text{H}$  NMR (400 MHz) spectrum of **4** in  $\text{CD}_2\text{Cl}_2$ .

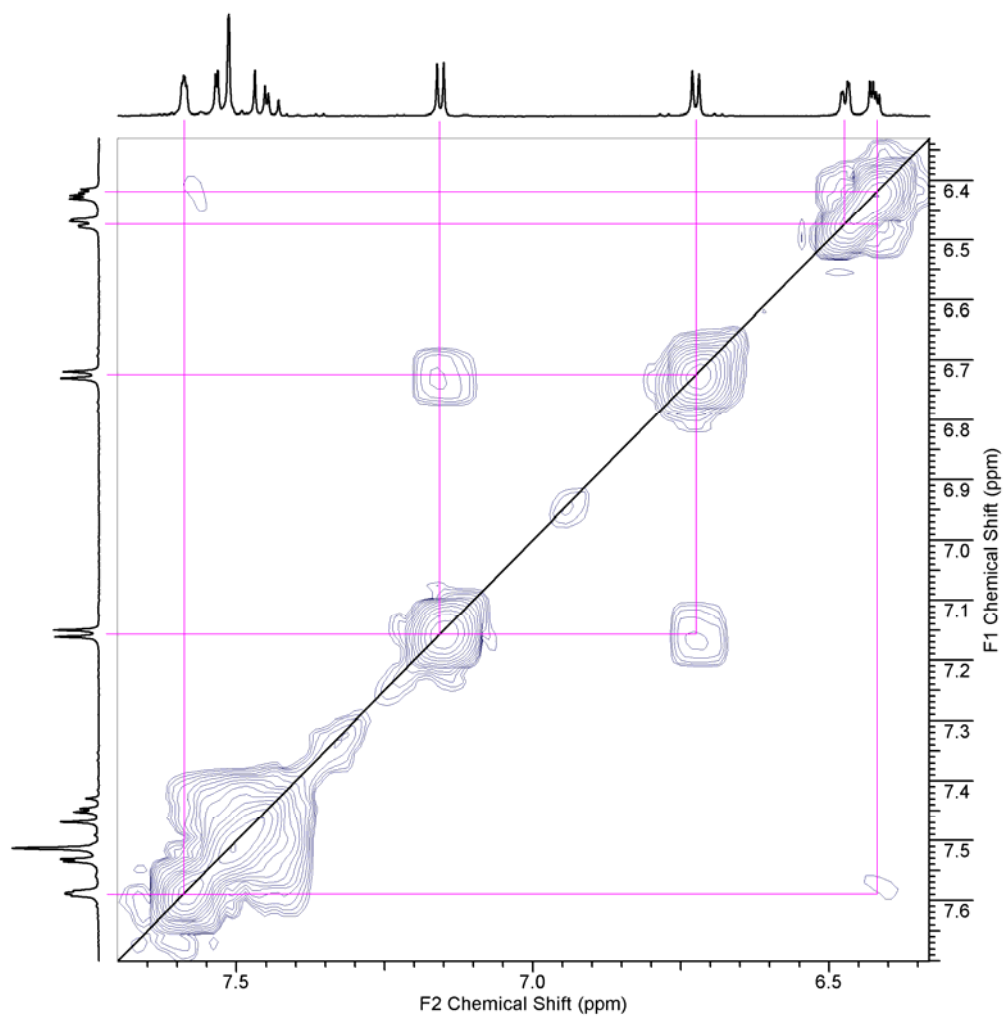

**Figure S9.** HH COSY NMR ( $F_1 = F_2 = 400$  MHz) spectrum of **4** in  $\text{CD}_2\text{Cl}_2$ .

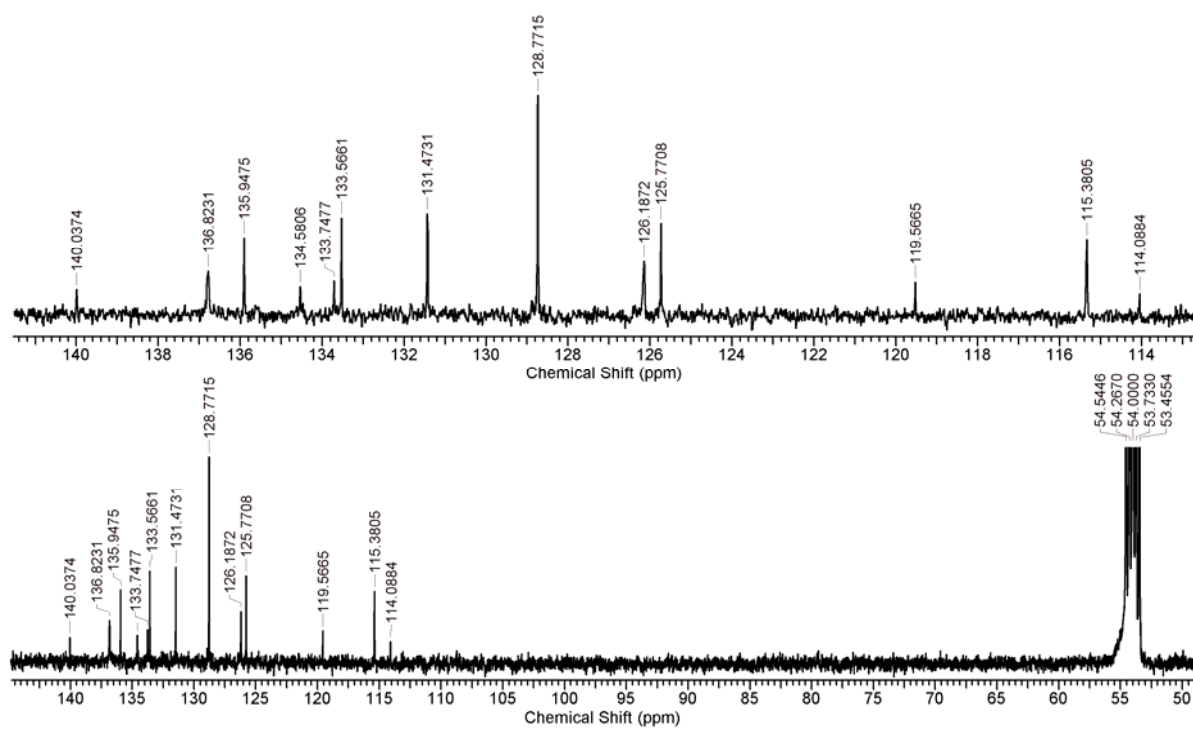

**Figure S10.**  $^{13}\text{C}$  NMR (100 MHz) spectrum of **4** in  $\text{CD}_2\text{Cl}_2$ .

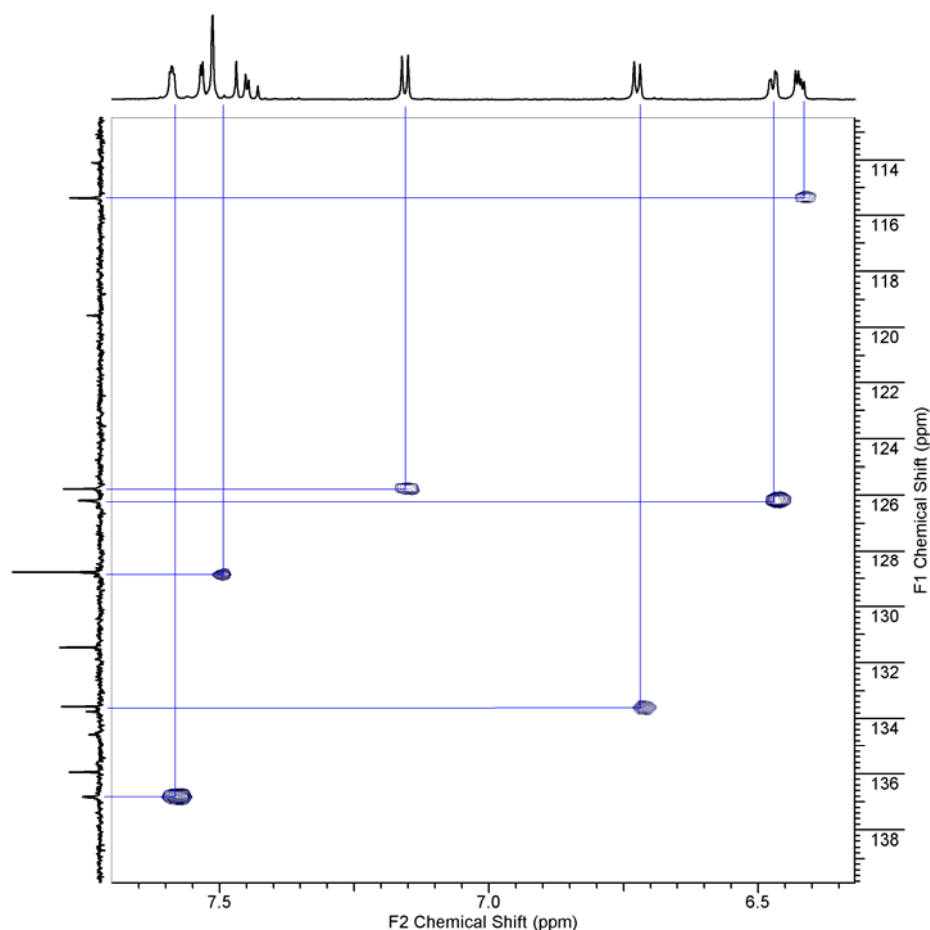

**Figure S11.** HMQC NMR (F1 = 100 MHz and F2 = 400 MHz) spectrum of **4** in  $\text{CD}_2\text{Cl}_2$ .

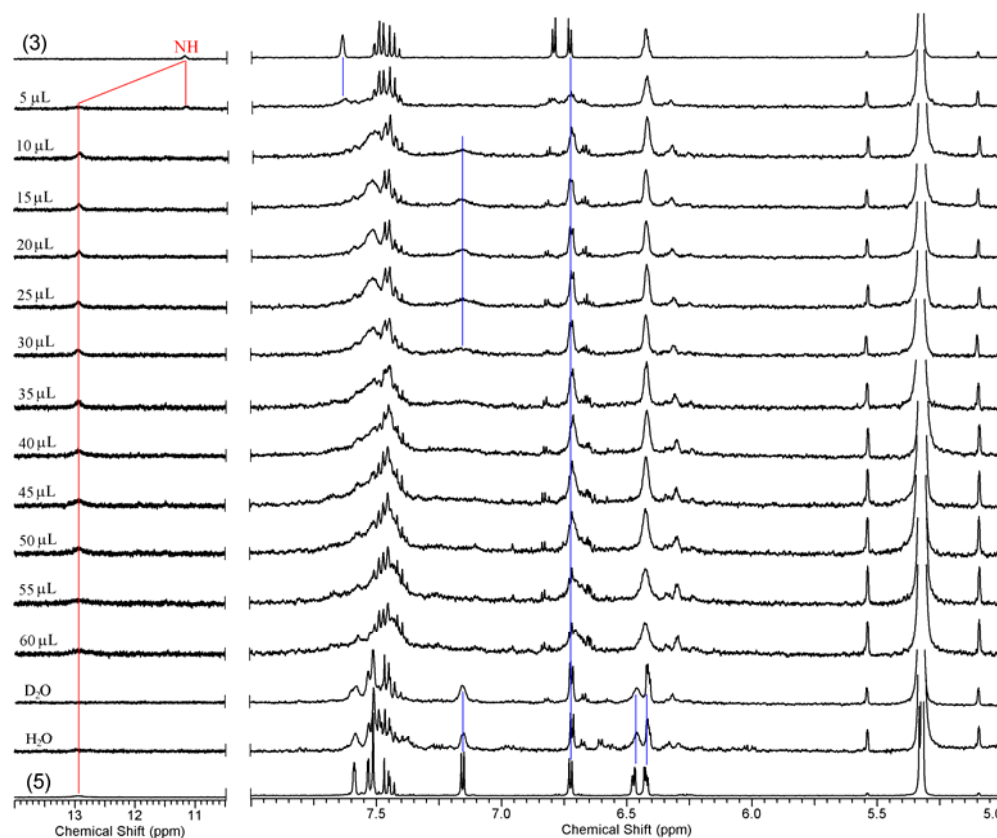

**Figure S12.**  $^1\text{H}$  NMR spectral changes of  $\text{CD}_2\text{Cl}_2$  (1 mL) solution of **3** (1  $\mu\text{mole}$ ) by adding  $\text{Et}_3\text{N}$  (5 ~ 60  $\mu\text{L}$ ) followed by  $\text{D}_2\text{O}$  and  $\text{H}_2\text{O}$ ; for the comparison, the  $^1\text{H}$  NMR spectrum of **4** in  $\text{CD}_2\text{Cl}_2$  has been added as the last spectrum.

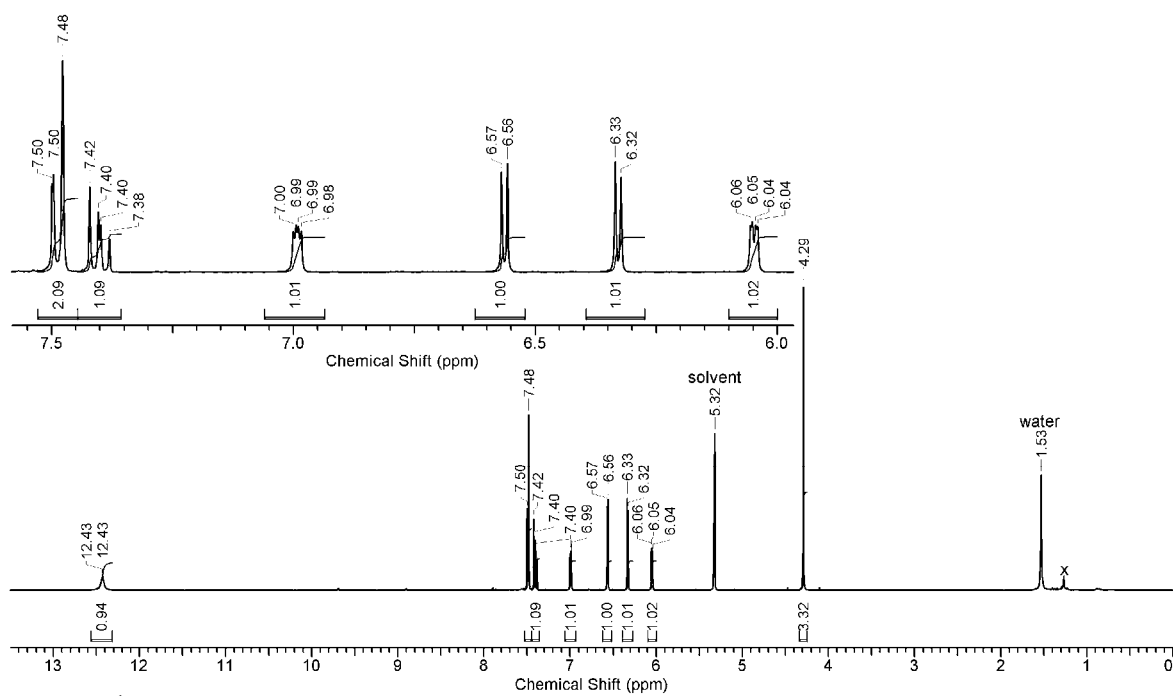

**Figure S13.**  $^1\text{H}$  NMR (400 MHz) spectra of **5** in  $\text{CD}_2\text{Cl}_2$ .

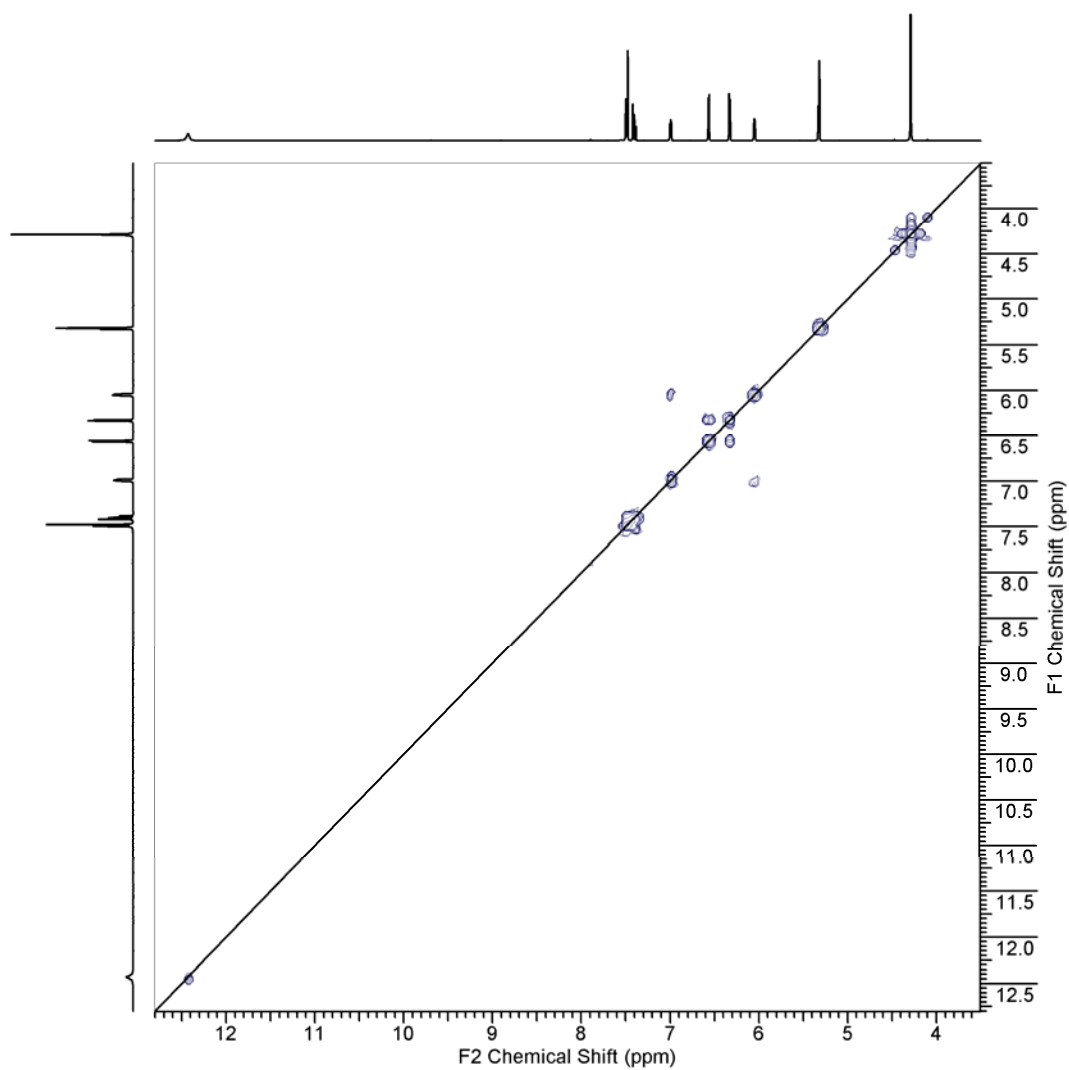

**Figure S14.** HH COSY NMR (F1 = F2 = 400 MHz) spectrum of **5** in  $\text{CD}_2\text{Cl}_2$ .



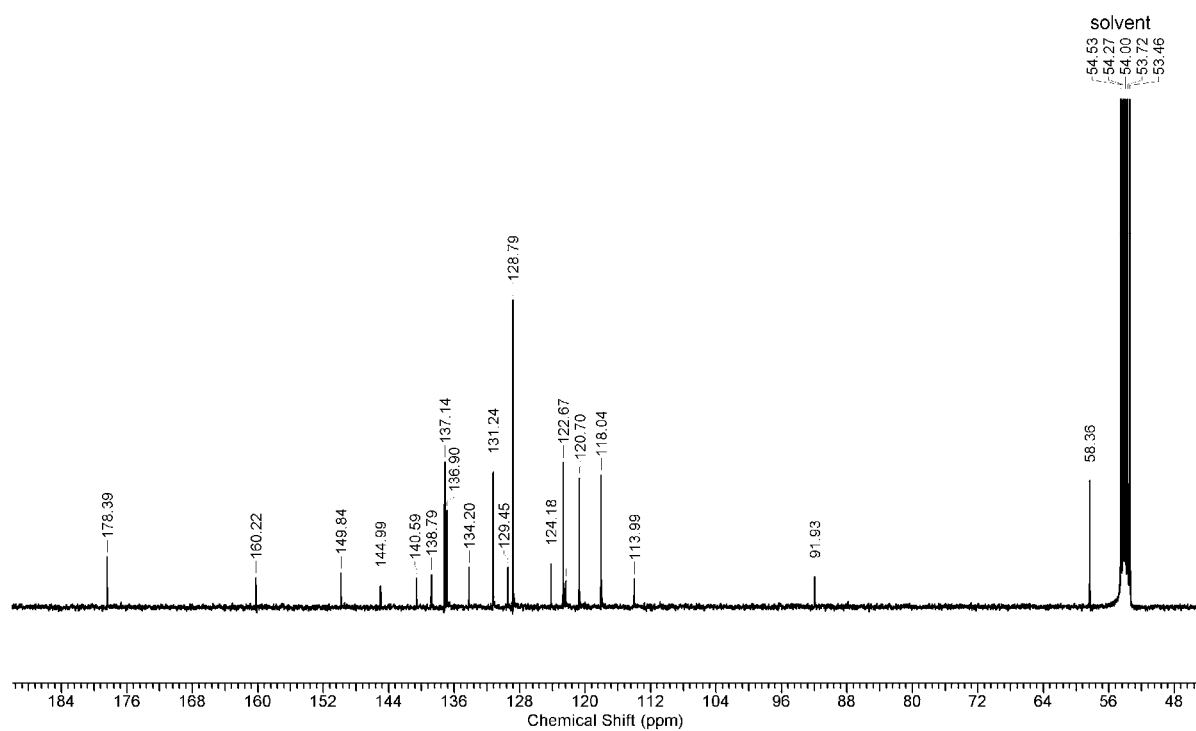

**Figure S15.**  $^{13}\text{C}$  NMR (100 MHz) spectrum of **5** in  $\text{CD}_2\text{Cl}_2$ .

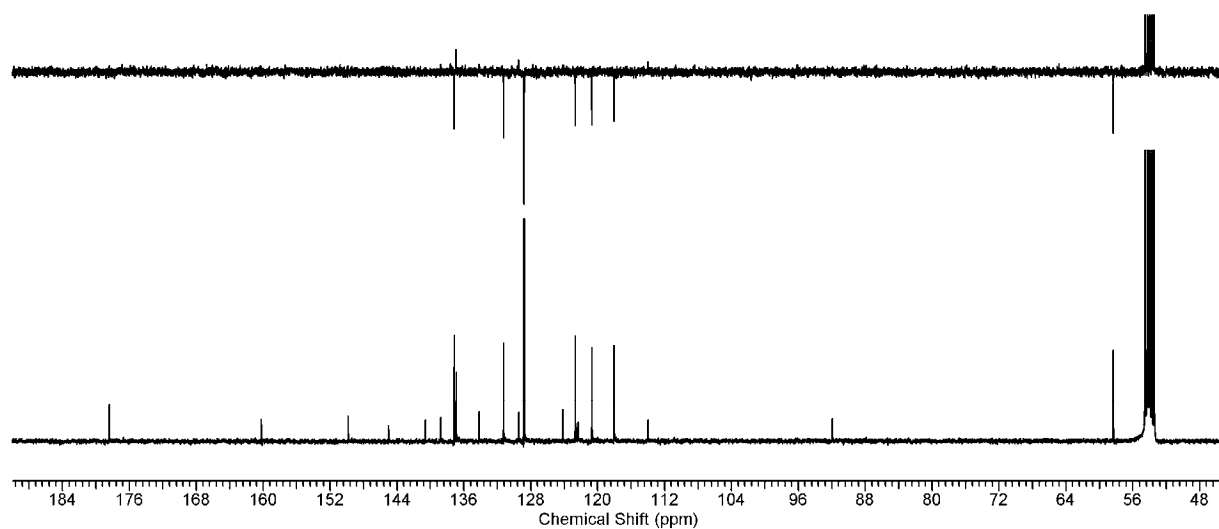

**Figure S16.** 45 deg APT (up) and  $^{13}\text{C}$  NMR (down) spectra (100 MHz) of **5** in  $\text{CD}_2\text{Cl}_2$ .

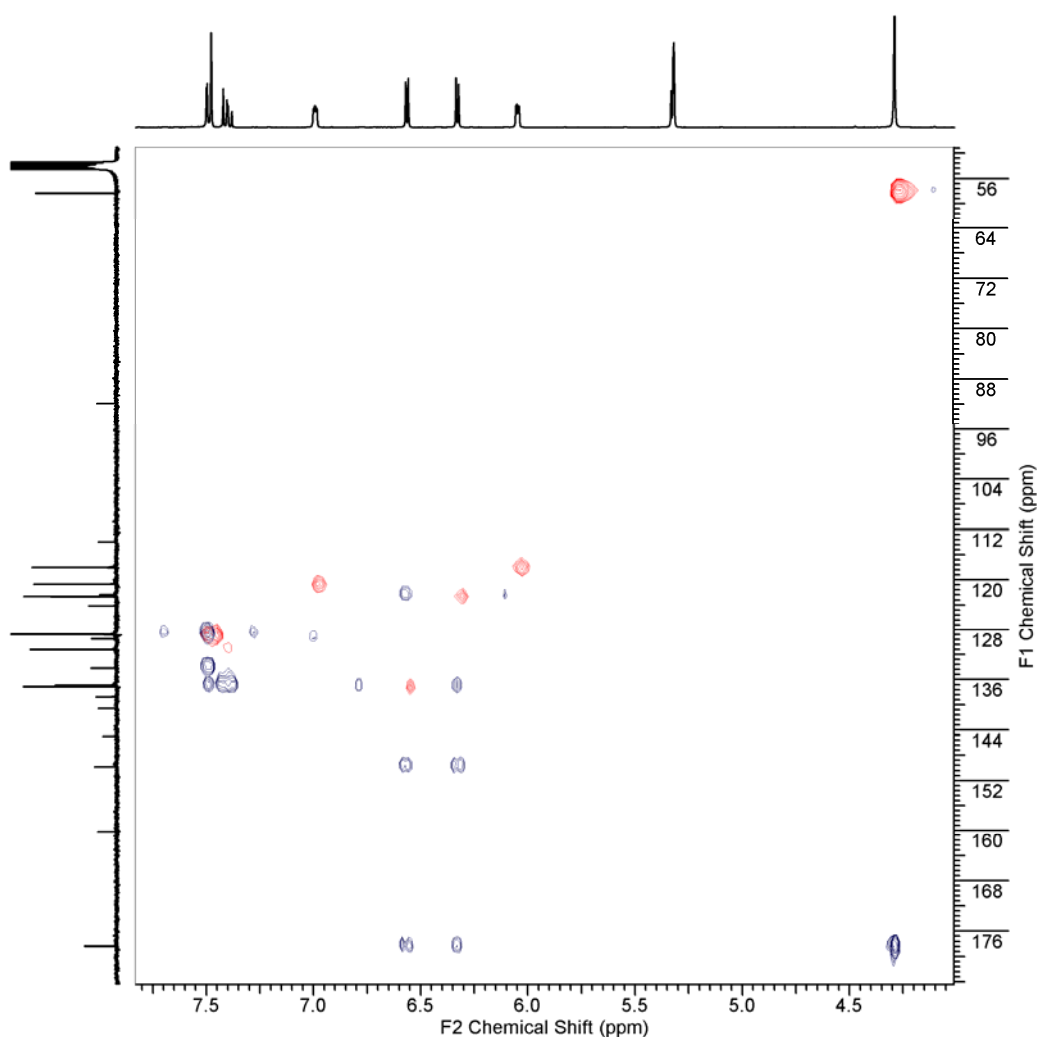

**Figure S17.** HMQC (red) and HMBC (blue) NMR (F1 = 400 MHz, F2 = 100 MHz) spectra of **5** in CD<sub>2</sub>Cl<sub>2</sub>.

### Crystallographic data

#### Crystallographic data of **3**

A red crystal of C<sub>38</sub>H<sub>18</sub>N<sub>6</sub>O<sub>2</sub>Cl<sub>6</sub>·CH<sub>2</sub>Cl<sub>2</sub> having approximate dimensions of 0.04 × 0.22 × 0.50 mm was mounted on a glass fiber. All measurements were made on a Bruker X8 APEX II diffractometer with graphite monochromated Mo-Kα radiation. The data were collected at a temperature of -100.0 ± 0.1°C to a maximum 2θ value of 56.0°. Data were collected in a series of φ and ω scans in 0.50° oscillations with 20.0 second exposures. The crystal-to-detector distance was 36.00 mm.

Of the 33043 reflections that were collected, 9356 were unique ( $R_{\text{int}} = 0.032$ ); equivalent reflections were merged. Data were collected and integrated using the Bruker SAINT<sup>S2</sup> software package. The linear absorption coefficient,  $\mu$ , for Mo-Kα radiation is 6.19 cm<sup>-1</sup>. Data were corrected for absorption effects using the multi-scan technique (SADABS<sup>S3</sup>), with minimum and maximum transmission coefficients of 0.892 and 0.976, respectively. The data were corrected for Lorentz and polarization effects.

The structure was solved by direct methods<sup>S4</sup>. The molecule crystallizes with CH<sub>2</sub>Cl<sub>2</sub> in the lattice. One solvent molecule was modelled, however a second was disordered in such a way that it was not possible to achieve a reasonable model. As a result the PLATON/SQUEEZE<sup>S5</sup> program was used to generate a data set free of any electron density in the region of the disordered solvent. All non-hydrogen atoms were refined anisotropically. All hydrogen atoms were placed in calculated positions but were not refined. The final cycle of full-matrix least-squares refinement<sup>S6</sup> on  $F^2$  was based on 9356 reflections and 504 variable parameters and converged (largest parameter shift was 0.00 times its esd with unweighted and weighted agreement factors ( $R_1 = 0.077$  and  $wR_2 = 0.174$ )).

The standard deviation of an observation of unit weight<sup>S7</sup> was 1.17. The weighting scheme was based on counting statistics. The maximum and minimum peaks on the final difference Fourier map corresponded to 0.95 and -1.38 e<sup>-</sup>/Å<sup>3</sup>, respectively.

Neutral atom scattering factors were taken from Cromer and Waber<sup>S8</sup>. Anomalous dispersion effects were included in  $F_{\text{calc}}$ <sup>S9</sup>; the values for  $\Delta f'$  and  $\Delta f''$  were those of Creagh and McAuley<sup>S10</sup>. The values for the mass

attenuation coefficients are those of Creagh and Hubbell<sup>S11</sup>. All refinements were performed using the SHELXTL<sup>S12</sup> crystallographic software package from Bruker-AXS.

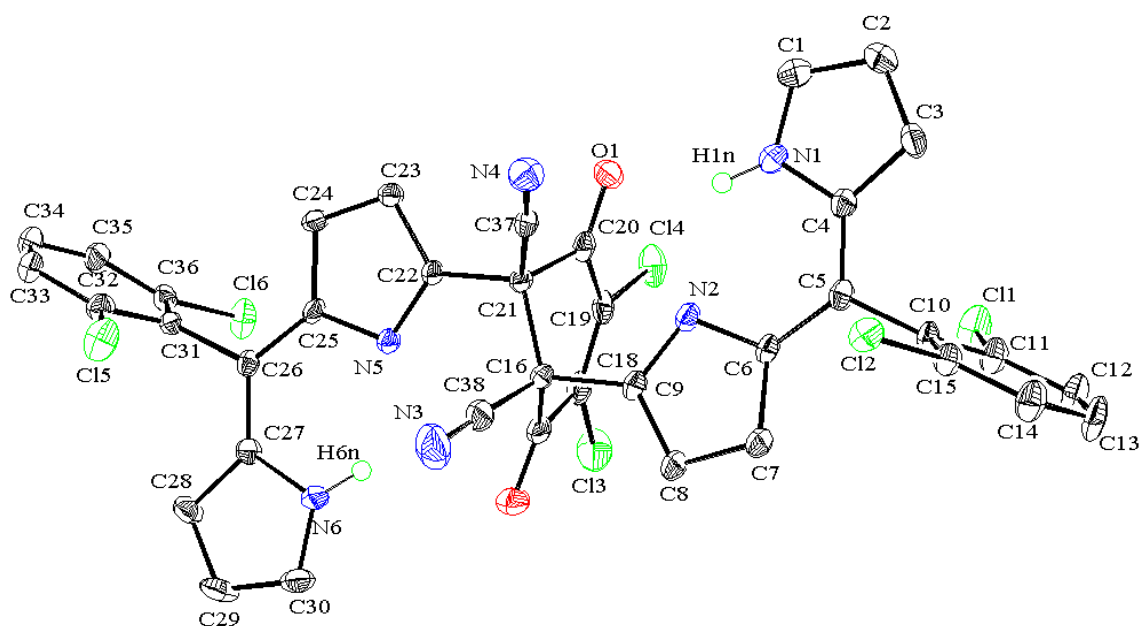

**Figure S18.** ORTEP structure of **3**. Thermal ellipsoids are scaled to the 50% probability level.

**Table S1.** Parameters of the hydrogen-bonds for **3**.

| Donor --- H...Acceptor | D - H   | H...A   | D...A    | D - H...A |
|------------------------|---------|---------|----------|-----------|
| N(1) --H(1n) ...O(1)   | 0.77(4) | 2.55(3) | 3.155(3) | 137(3)    |
| N(1) --H(1n) ..N(2)    | 0.77(4) | 2.25(3) | 2.765(3) | 125(3)    |
| N(6) --H(6n) ..O(2)    | 0.80(4) | 2.50(3) | 3.158(3) | 140(3)    |
| N(6) --H(6n) ..N(5)    | 0.80(4) | 2.19(3) | 2.758(3) | 128(3)    |

#### Crystallographic data of **4**

An irregular green crystal of  $C_{34}H_{18}N_6Cl_4$  having approximate dimensions of  $0.17 \times 0.20 \times 0.30$  mm was mounted on a glass fiber. All measurements were made on a Bruker X8 APEX II diffractometer with graphite monochromated Mo-K $\alpha$  radiation. The data were collected at a temperature of  $-100.0 \pm 0.1^\circ\text{C}$  to a maximum  $2\theta$  value of  $56.0^\circ$ . Data were collected in a series of  $\phi$  and  $\omega$  scans in  $0.50^\circ$  oscillations with 20.0 second exposures. The crystal-to-detector distance was 36.00 mm.

Of the 63004 reflections that were collected, 7054 were unique ( $R_{\text{int}} = 0.038$ ); equivalent reflections were merged. Data were collected and integrated using the Bruker SAINT<sup>S2</sup> software package. The linear absorption coefficient,  $\mu$ , for Mo-K $\alpha$  radiation is  $4.39\text{ cm}^{-1}$ . Data were corrected for absorption effects using the multi-scan technique (SADABS<sup>S3</sup>), with minimum and maximum transmission coefficients of 0.868 and 0.928, respectively. The data were corrected for Lorentz and polarization effects.

The structure was solved by direct methods<sup>S4</sup>. All non-hydrogen atoms were refined anisotropically. All N-H hydrogen atoms were located in difference maps and refined isotropically. All other hydrogen atoms were placed in calculated positions but were not refined. The final cycle of full-matrix least-squares refinement<sup>S6</sup> on  $F^2$  was based on 7054 reflections and 405 variable parameters and converged (largest parameter shift was 0.00 times its esd) with unweighted and weighted agreement factors ( $R1 = 0.053$  and  $wR2 = 0.082$ ).

The standard deviation of an observation of unit weight<sup>S7</sup> was 1.02. The weighting scheme was based on counting statistics. The maximum and minimum peaks on the final difference Fourier map corresponded to 0.32 and  $-0.33\text{ e}^-/\text{\AA}^3$ , respectively.

Neutral atom scattering factors were taken from Cromer and Waber<sup>S8</sup>. Anomalous dispersion effects were included in  $F_{\text{calc}}$ <sup>S9</sup>; the values for  $\Delta f'$  and  $\Delta f''$  were those of Creagh and McAuley<sup>S10</sup>. The values for the mass attenuation coefficients are those of Creagh and Hubbell<sup>S11</sup>. All refinements were performed using the SHELXTL<sup>S12</sup> crystallographic software package from Bruker-AXS.

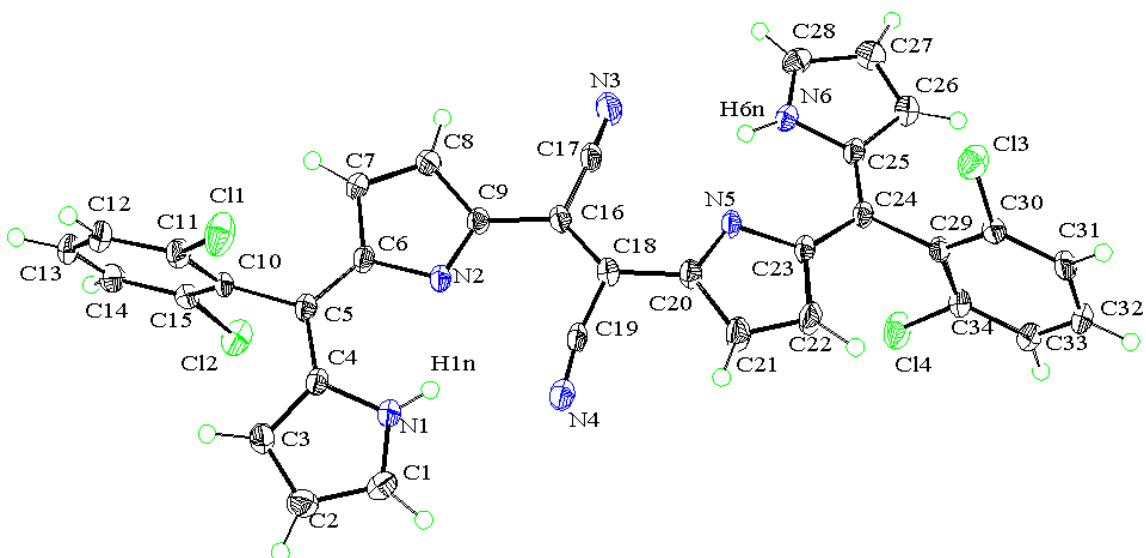

**Figure S19.** ORTEP structure of **4**. Thermal ellipsoids are scaled to the 50% probability level.

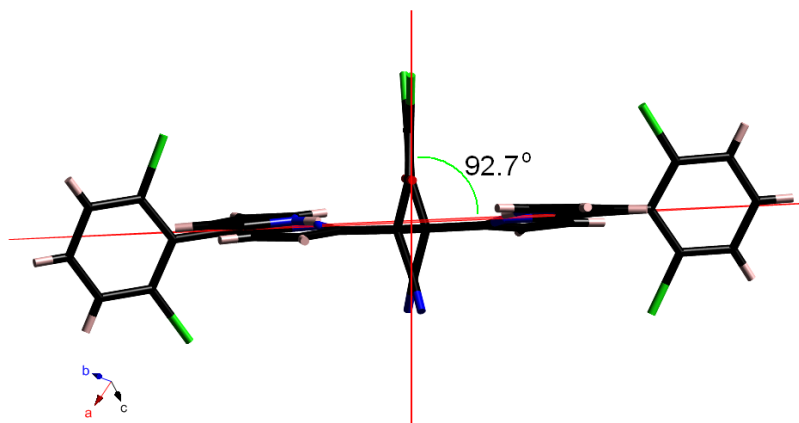

**Figure S20.** Perpendicular planes for crystal structure of **4**.

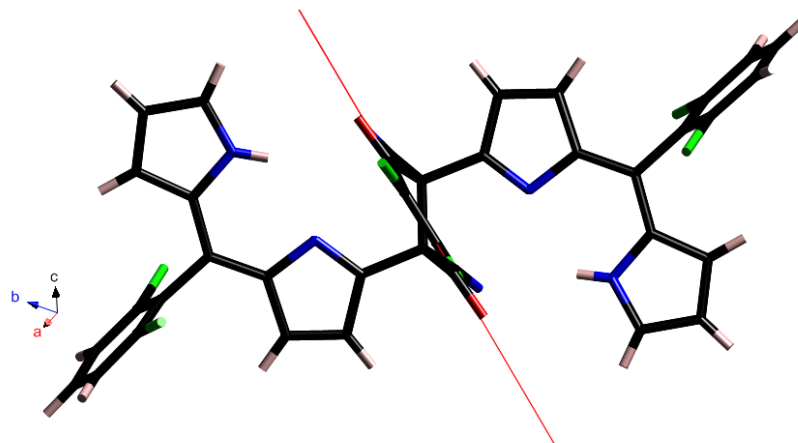

**Figure S21.** C2 symmetric axis for crystal structure of **4**.

**Table S2.** Parameters of the hydrogen-bonds for **4**.

| Donor --- H...Acceptor | D - H   | H...A   | D...A      | D - H...A |
|------------------------|---------|---------|------------|-----------|
| N(1) --H(1n) ...N(2)   | 0.83(2) | 2.16(2) | 2.7338(19) | 126.3(17) |
| N(1) --H(1n) ...N(4)   | 0.83(2) | 2.31(2) | 3.008(2)   | 142.9(18) |
| N(6) --H(6n) ...N(3)   | 0.87(2) | 2.52(2) | 3.264(2)   | 144.0(17) |
| N(6) --H(6n) ...N(5)   | 0.87(2) | 2.13(2) | 2.7542(19) | 127.7(17) |

### Crystallographic data of 5

An irregular violet crystal of  $C_{22}H_{11}N_3O_3Cl_4$  having approximate dimensions of  $0.12 \times 0.18 \times 0.40$  mm was mounted on a glass fiber. All measurements were made on a Bruker X8 APEX II diffractometer with graphite monochromated Mo-K $\alpha$  radiation. The data were collected at a temperature of  $-100.0 \pm 0.1^\circ\text{C}$  to a maximum  $2\theta$  value of  $56.0^\circ$ . Data were collected in a series of  $\phi$  and  $\omega$  scans in  $0.50^\circ$  oscillations with 20.0 second exposures. The crystal-to-detector distance was 36.00 mm.

Of the 36940 reflections that were collected, 5085 were unique ( $R_{\text{int}} = 0.029$ ); equivalent reflections were merged. Data were collected and integrated using the Bruker SAINT<sup>S2</sup> software package. The linear absorption coefficient,  $\mu$ , for Mo-K $\alpha$  radiation is  $5.95\text{ cm}^{-1}$ . Data were corrected for absorption effects using the multi-scan technique (SADABS<sup>S3</sup>), with minimum and maximum transmission coefficients of 0.864 and 0.931, respectively. The data were corrected for Lorentz and polarization effects.

The structure was solved by direct methods<sup>S4</sup>. All non-hydrogen atoms were refined anisotropically. All C-H hydrogen atoms were placed in calculated positions but were not refined. The N-H hydrogen atom was located in a difference map and refined isotropically. The final cycle of full-matrix least-squares refinement<sup>S6</sup> on  $F^2$  was based on 5085 reflections and 294 variable parameters and converged (largest parameter shift was 0.00 times its esd) with unweighted and weighted agreement factors ( $R1 = 0.053$  and  $wR2 = 0.082$ ).

The standard deviation of an observation of unit weight<sup>S7</sup> was 1.03. The weighting scheme was based on counting statistics. The maximum and minimum peaks on the final difference Fourier map corresponded to 0.37 and  $-0.35\text{ e}/\text{\AA}^3$ , respectively.

Neutral atom scattering factors were taken from Cromer and Waber<sup>S8</sup>. Anomalous dispersion effects were included in  $F_{\text{calc}}$ <sup>S9</sup>; the values for  $\Delta f'$  and  $\Delta f''$  were those of Creagh and McAuley<sup>S10</sup>. The values for the mass attenuation coefficients are those of Creagh and Hubbell<sup>S11</sup>. All refinements were performed using the SHELXTL<sup>S12</sup> crystallographic software package from Bruker-AXS.

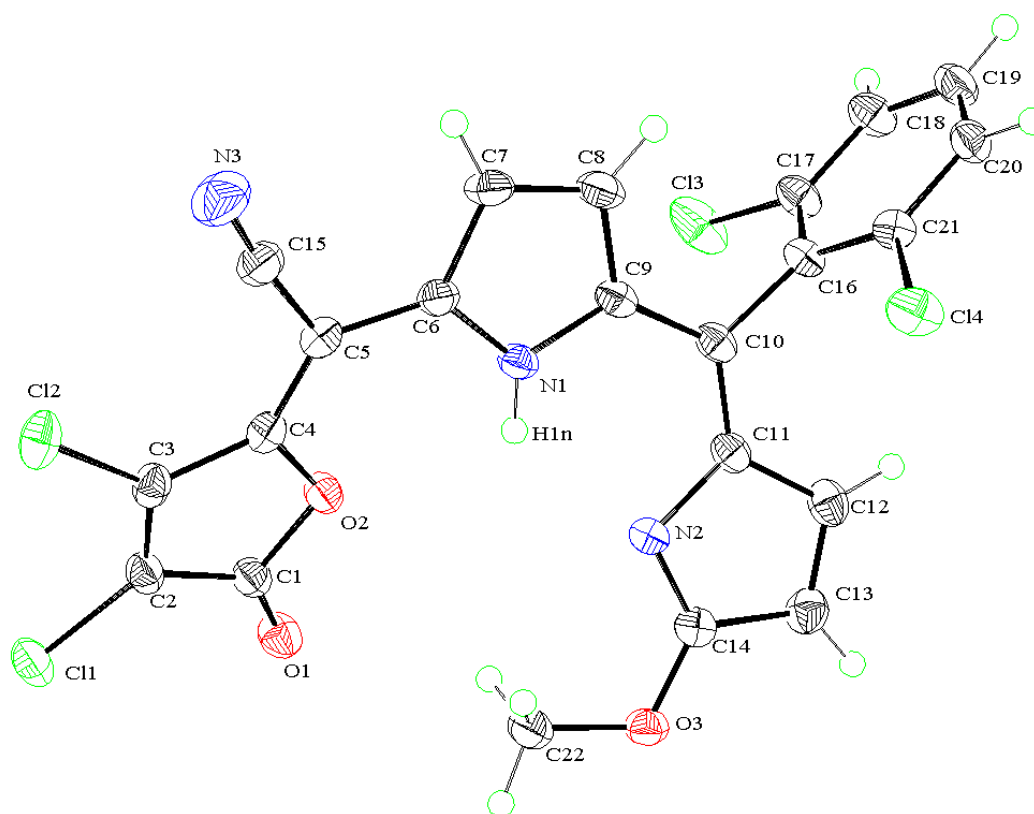

**Figure S22.** ORTEP structure of **6**. Thermal ellipsoids are scaled to the 50% probability level.

**Table S3.** Parameters of the hydrogen-bonds for **5**.

| Donor --- H...Acceptor | D - H     | H...A     | D...A      | D - H...A |
|------------------------|-----------|-----------|------------|-----------|
| N(1) --H(1n) ..O(2)    | 0.839(19) | 2.360(19) | 2.7781(16) | 111.4(14) |
| N(1) --H(1n) ..N(2)    | 0.839(19) | 2.140(17) | 2.7383(18) | 128.1(16) |

**Table S4.** Crystallographic Data of **3**, **4** and **5**.

|                                                                                                   | <b>3</b>                                                                      | <b>4</b>                                                       | <b>5</b>                                                                      |
|---------------------------------------------------------------------------------------------------|-------------------------------------------------------------------------------|----------------------------------------------------------------|-------------------------------------------------------------------------------|
| Formula                                                                                           | C <sub>39</sub> H <sub>20</sub> N <sub>6</sub> O <sub>2</sub> Cl <sub>8</sub> | C <sub>34</sub> H <sub>18</sub> N <sub>6</sub> Cl <sub>4</sub> | C <sub>22</sub> H <sub>11</sub> N <sub>3</sub> Cl <sub>4</sub> O <sub>3</sub> |
| Mw                                                                                                | 888.21                                                                        | 652.34                                                         | 507.14                                                                        |
| cryst syst                                                                                        | triclinic                                                                     | monoclinic                                                     | triclinic                                                                     |
| Space group                                                                                       | <i>P</i> -1 (# 2)                                                             | <i>P</i> 2 <sub>1</sub> / <i>c</i> (#14)                       | <i>P</i> -1 (# 2)                                                             |
| <i>a</i> /Å                                                                                       | 11.2796(18)                                                                   | 14.1530(16)                                                    | 7.8137(8)                                                                     |
| <i>b</i> /Å                                                                                       | 12.066(2)                                                                     | 10.3574(11)                                                    | 9.9057(11)                                                                    |
| <i>c</i> /Å                                                                                       | 14.734(2)                                                                     | 20.116(2)                                                      | 14.0847(16)                                                                   |
| $\alpha$ /deg                                                                                     | 83.100(8)                                                                     | 90.0                                                           | 84.895(5)                                                                     |
| $\beta$ /deg                                                                                      | 79.807(8)                                                                     | 92.535(5)                                                      | 77.368(5)                                                                     |
| $\gamma$ /deg                                                                                     | 89.782(8)                                                                     | 90.0                                                           | 81.828(2)                                                                     |
| <i>V</i> /Å <sup>3</sup>                                                                          | 1959.0(6)                                                                     | 2945.8(6)                                                      | 1051.0(2)                                                                     |
| <i>Z</i>                                                                                          | 2                                                                             | 4                                                              | 2                                                                             |
| <i>D<sub>c</sub></i> /g cm <sup>-3</sup>                                                          | 1.506                                                                         | 1.471                                                          | 1.603                                                                         |
| $\mu$ (MoK $\alpha$ )/cm <sup>-1</sup>                                                            | 6.19                                                                          | 4.39                                                           | 5.95                                                                          |
| No. of obsd data<br>( <i>I</i> > 0.00 $\sigma$ ( <i>I</i> ))                                      | 9356                                                                          | 7054                                                           | 5085                                                                          |
| Reflection / Parameter<br>Ratio                                                                   | 18.56                                                                         | 17.42                                                          | 17.30                                                                         |
| <i>RI</i> <sup>a</sup> ; <i>wR2</i> <sup>b</sup>                                                  | 0.077; 0.174                                                                  | 0.053; 0.082                                                   | 0.038; 0.079                                                                  |
| GOF                                                                                               | 1.17                                                                          | 1.02                                                           | 1.03                                                                          |
| No. of obsd data ( <i>I</i> > 2 $\sigma$ ( <i>I</i> ))<br>( <i>RI</i> ; <i>wR2</i> ) <sup>c</sup> | 6694<br>(0.053; 0.163)                                                        | 5367<br>(0.033; 0.073)                                         | 4365<br>(0.030; 0.074)                                                        |

<sup>a</sup>  $R1 = \sum \omega ||F_o| - |F_c|| / \sum \omega |F_o|$ , <sup>b</sup>  $wR2 = \sqrt{\sum \{\omega (F_o^2 - F_c^2)^2\} / \sum \omega (F_o^2)^2}$  <sup>c</sup> refined on F, *I* > 2 $\sigma$ (*I*)

## Reference

- S1. C. H. Lee, J. S. Lindsey, *Tetrahedron*, **1994**, *50*, 11427-11440.
- S2. **SAINT**. Version 7.03A. Bruker AXS Inc., Madison, Wisconsin, USA. (1997-2003).
- S3. **SADABS**. Bruker Nonius area detector scaling and absorption correction – V2.10, Bruker AXS Inc., Madison, Wisconsin, USA. (2003).
- S4. **SIR97**. A. Altomare, M. C. Burla, M. Camalli, G. L. Cascarano, C. Giacovazzo, A. Guagliardi, A. G. G. Moliterni, G. Polidori and R. Spagna, *J. Appl. Cryst.*, 1999, **32**, 115-119.
- S5. **SQUEEZE**. P. v.d. Sluis and A. L. Spek, *Acta Crystallogr., Sect A*, 1990, **46**, 194-201.
- S6. Least Squares function minimized:  $\sum w(F_o^2 - F_c^2)^2$
- S7. Standard deviation of an observation of unit weight:  $[\sum w(F_o^2 - F_c^2)^2 / (N_o - N_v)]^{1/2}$   
Where: *N<sub>o</sub>* = number of observations  
*N<sub>v</sub>* = number of variables
- S8. D. T. Cromer and J. T. Waber: *International Tables for X-ray Crystallography*, Vol. IV, The Kynoch Press, Birmingham, England, Table 2.2A, (1974).
- S9. J. A Ibers and W. C. Hamilton, *Acta Crystallogr.*, 1964, **17**, 781.
- S10. D. C. Creagh and W. J. McAuley: *International Tables for Crystallography*, Vol. C, (A. J. C. Wilson, ed.), Kluwer Academic Publishers, Boston, Table 4.2.6.8, pages 219-222 (1992).
- S11. D. C. Creagh and J. H. Hubbell: *International Tables for Crystallography*, Vol. C, (A. J. C. Wilson, ed.), Kluwer Academic Publishers, Boston, Table 4.2.4.3, pages 200-206 (1992).
- S12. **SHELXTL**. Version 5.1, Bruker AXS Inc., Madison, Wisconsin, USA. (1997).

- Perfluorophenyl substituted dipyrromethane formed a DDQ adduct in higher yield (~ 20%). The (a)  $^1\text{H}$  and (b)  $^{19}\text{F}$  NMR spectra (in  $\text{CD}_2\text{Cl}_2$ ) are included below.

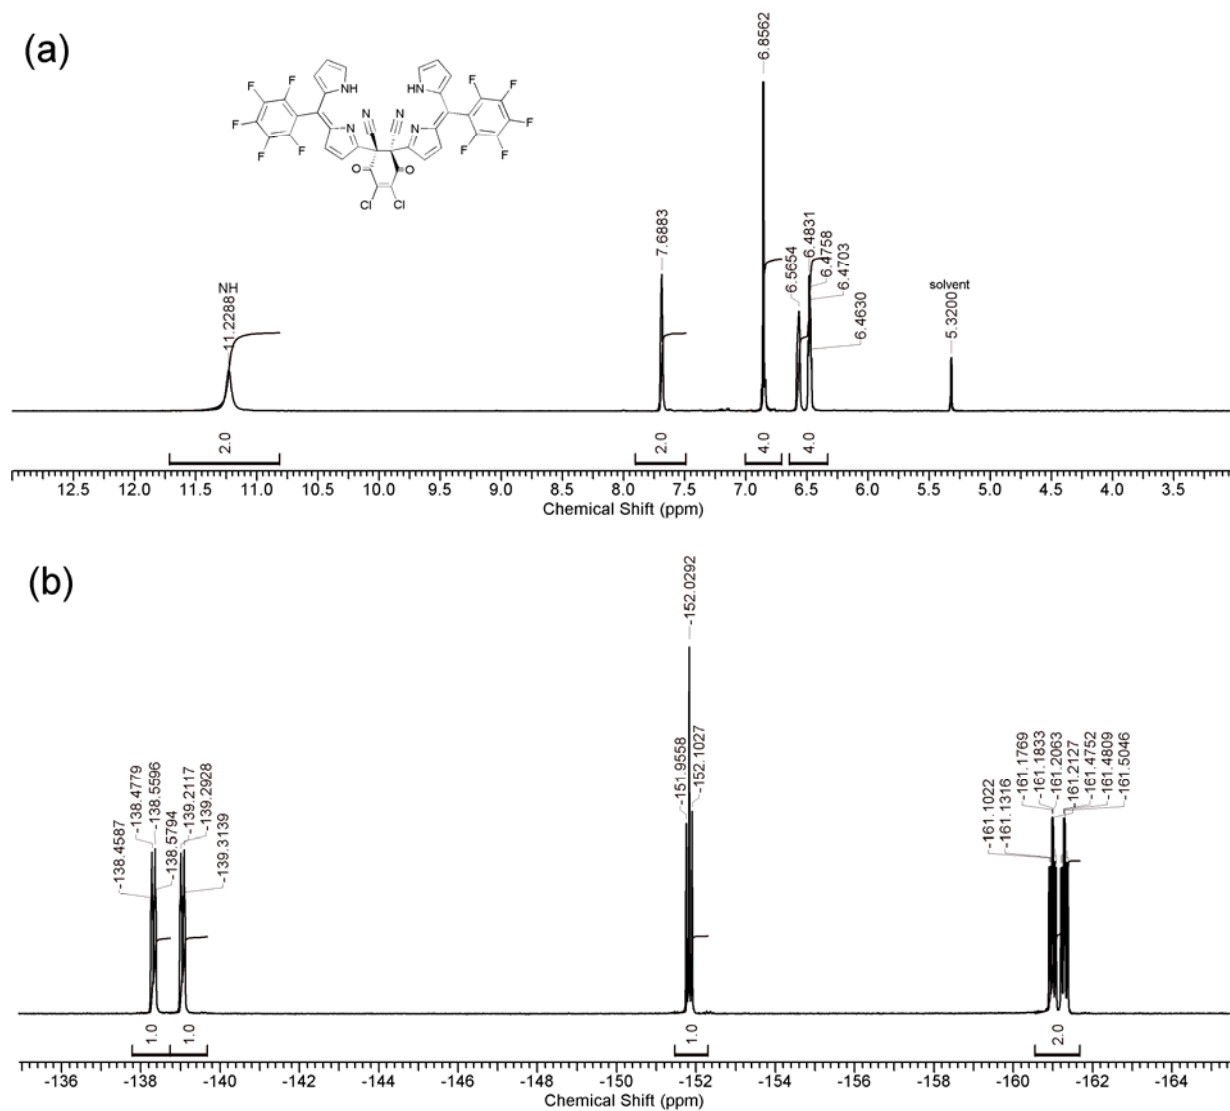

Supplement: b904446a.pdf [file b904446a.pdf]
